# Supplementary material for: NMR analysis of the enantiomeric purity of chiral diols by a new chiral boron agent
Source: Royal Society of Chemistry journal article supplement (doi:10.1039/d2ra00428c), 2022-01-01
Supplement: d2ra00428c1.pdf [file d2ra00428c1.pdf]

## Supporting Information

### NMR analysis of the enantiomeric purity of chiral diols by a new chiral boron agent

Xuebo Zhang,<sup>a,b</sup> Jing Xu,<sup>a,b</sup> Zhaofeng Sun,<sup>b</sup> Guangling Bian<sup>\*b</sup> and Ling Song<sup>\*b</sup>

a. College of Chemistry and Materials Science, Fujian Normal University, Fuzhou, China;

b. The Key Laboratory of Coal to Ethylene Glycol and Its Related Technology, Fujian Institute of  
Research on the Structure of Matter, Chinese Academy of Sciences, Fuzhou, Fujian, China;

Email: glb@fjirsm.ac.cn; songling@fjirsm.ac.cn

#### Table of contents

|                                                                                                                             |    |
|-----------------------------------------------------------------------------------------------------------------------------|----|
| 1. Crystallographic data .....                                                                                              | 2  |
| 2. NMR spectra data.....                                                                                                    | 3  |
| Figure S1: <sup>1</sup> H NMR of boric acid D (400 MHz, CDCl <sub>3</sub> ) .....                                           | 3  |
| Figure S2: <sup>13</sup> C NMR of boric acid D (100 MHz, CDCl <sub>3</sub> ) .....                                          | 3  |
| Figure S3: COSY of boric acid D (400 MHz, CD <sub>2</sub> Cl <sub>2</sub> ) .....                                           | 4  |
| Figure S4: HMBC of boric acid D (400 MHz, CDCl <sub>3</sub> ).....                                                          | 5  |
| Figure S5. NMR data attesting for the absence of racemization in the derivatization process .....                           | 6  |
| Figure S6. NMR data of optimization of derivatization reaction conditions .....                                             | 6  |
| Figure S7. <sup>1</sup> H NMR of boric acid D and racemic <b>1</b> .....                                                    | 7  |
| Figure S8. <sup>1</sup> H NMR of boric acid D and racemic <b>2</b> .....                                                    | 7  |
| Figure S9. <sup>1</sup> H NMR of boric acid D and <i>R</i> - <b>2</b> .....                                                 | 8  |
| Figure S10. <sup>1</sup> H NMR of boric acid D and racemic <b>3</b> .....                                                   | 8  |
| Figure S11. <sup>1</sup> H NMR of boric acid D and <i>R</i> - <b>3</b> .....                                                | 9  |
| Figure S12. <sup>1</sup> H NMR of boric acid D and racemic <b>4</b> .....                                                   | 9  |
| Figure S13. <sup>1</sup> H NMR of boric acid D and <i>S</i> - <b>4</b> .....                                                | 10 |
| Figure S14. <sup>1</sup> H NMR of boric acid D and racemic <b>5</b> .....                                                   | 10 |
| Figure S15. <sup>1</sup> H NMR of boric acid D and <i>S</i> - <b>5</b> .....                                                | 11 |
| Figure S16. <sup>1</sup> H NMR of boric acid D and racemic <b>6</b> .....                                                   | 11 |
| Figure S17. <sup>1</sup> H NMR of boric acid D and racemic <b>7</b> .....                                                   | 12 |
| Figure S18. <sup>1</sup> H NMR of boric acid D and <i>R</i> - <b>7</b> .....                                                | 12 |
| Figure S19. <sup>1</sup> H NMR of boric acid D and racemic <b>8</b> .....                                                   | 13 |
| Figure S20. <sup>1</sup> H NMR of boric acid D and ( <i>1R,2R,3S,5R</i> )-(-)- <b>8</b> .....                               | 13 |
| Figure S21. <sup>1</sup> H NMR of boric acid D and racemic <b>9</b> .....                                                   | 14 |
| Figure S22. <sup>1</sup> H NMR of boric acid D and racemic <b>10</b> .....                                                  | 14 |
| Figure S23. <sup>1</sup> H NMR of boric acid D and racemic <b>11</b> .....                                                  | 15 |
| Figure S24. <sup>1</sup> H NMR of boric acid D and racemic <b>12</b> .....                                                  | 15 |
| Figure S25. Ee values of nonracemic <b>1</b> determined by gravimetry and <sup>1</sup> H NMR spectra with boric acid D..... | 16 |

## 1. Crystallographic data

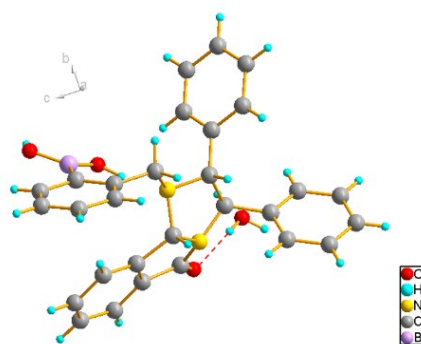

The crystal structure of boric acid D

Table S1. Crystal data and structure refinement for boric acid D.

|                                               |                                                               |
|-----------------------------------------------|---------------------------------------------------------------|
| Identification code                           | 2061749                                                       |
| Empirical formula                             | $C_{29}H_{26}BN_2O_{3.5}$                                     |
| Formula weight                                | 469.33                                                        |
| Temperature                                   | 150.04 K                                                      |
| Crystal system, space group                   | Orthorhombic, $P2_12_12_1$                                    |
| $a/\text{\AA}$                                | 7.7796(5)                                                     |
| $b/\text{\AA}$                                | 13.1314(11)                                                   |
| $c/\text{\AA}$                                | 24.231(2)                                                     |
| $\alpha/^\circ$                               | 90                                                            |
| $\beta/^\circ$                                | 90                                                            |
| $\gamma/^\circ$                               | 90                                                            |
| Volume/ $\text{\AA}^3$                        | 2475.4(3)                                                     |
| Z                                             | 4                                                             |
| $\rho_{\text{calc}}/\text{cm}^3$              | 1.259                                                         |
| $\mu/\text{mm}^{-1}$                          | 0.082                                                         |
| F (000)                                       | 988.0                                                         |
| Crystal size/ $\text{mm}^3$                   | $0.2 \times 0.15 \times 0.15$                                 |
| Radiation                                     | MoK $\alpha$ ( $\lambda = 0.71073$ )                          |
| $2\Theta$ range for data collection/ $^\circ$ | 6.206 to 60.058                                               |
| Index ranges                                  | $-9 \leq h \leq 10, -15 \leq k \leq 18, -34 \leq l \leq 25$   |
| Reflections collected                         | 21320                                                         |
| Independent reflections                       | 7192 [ $R_{\text{int}} = 0.0418, R_{\text{sigma}} = 0.0470$ ] |
| Data/restraints/parameters                    | 7192/3/339                                                    |
| Goodness-of-fit on $F^2$                      | 1.081                                                         |
| Final R indexes [ $I \geq 2\sigma(I)$ ]       | $R_1 = 0.0451, wR_2 = 0.1076$                                 |
| Final R indexes [all data]                    | $R_1 = 0.0499, wR_2 = 0.1108$                                 |
| Largest diff. peak/hole / $e \text{\AA}^{-3}$ | 0.42/-0.33                                                    |
| Flack parameter                               | 0.5(10)                                                       |

## 2. NMR spectra data

Figure S1:  $^1\text{H}$  NMR of boric acid D (400 MHz,  $\text{CDCl}_3$ )

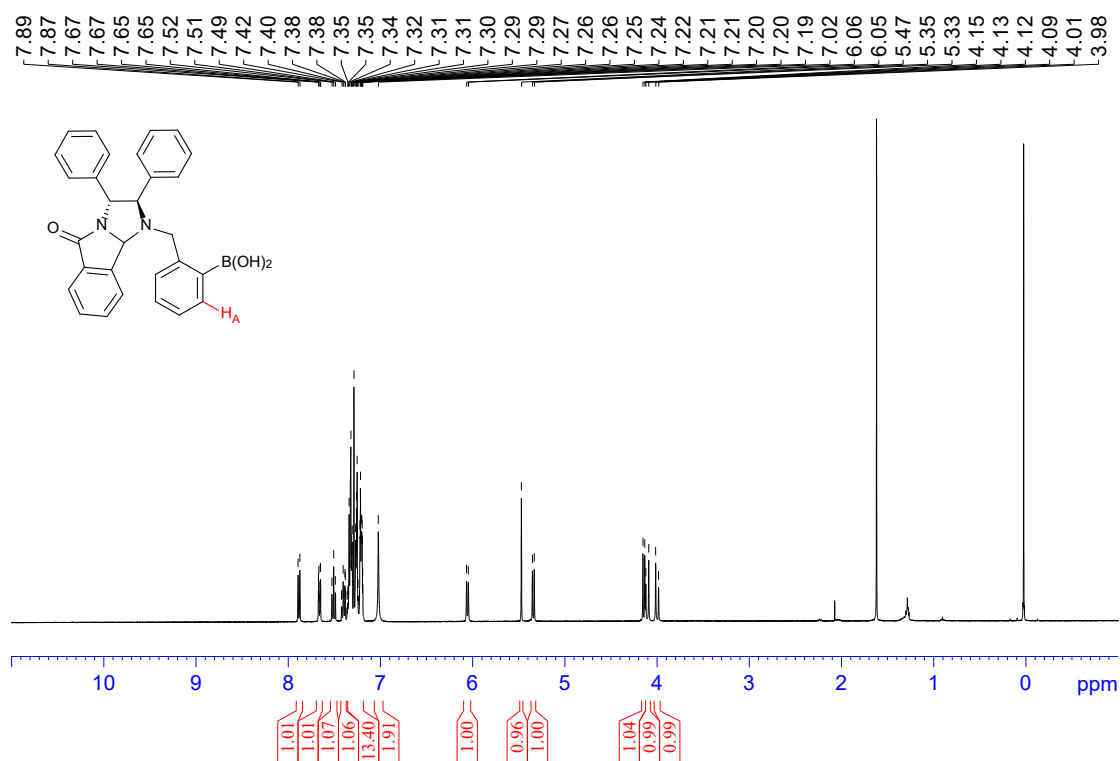

Figure S2:  $^{13}\text{C}$  NMR of boric acid D (100 MHz,  $\text{CDCl}_3$ )

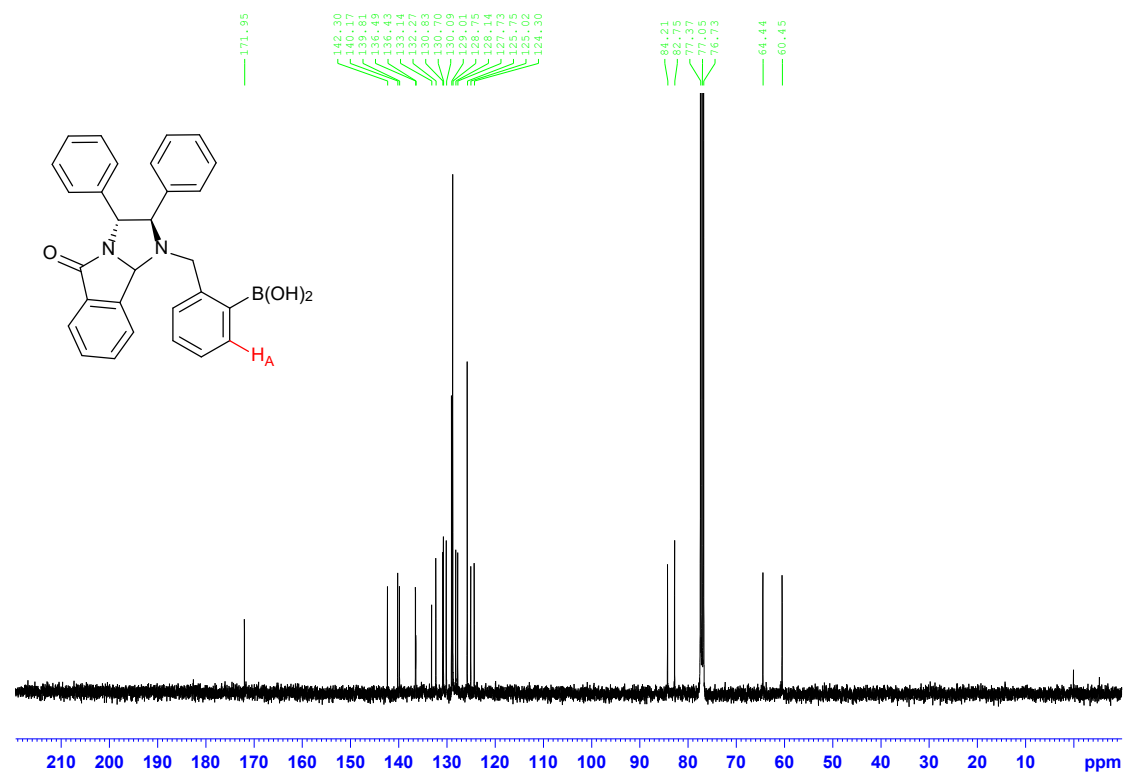

Figure S3: COSY of boric acid D (400 MHz, CD<sub>2</sub>Cl<sub>2</sub>)

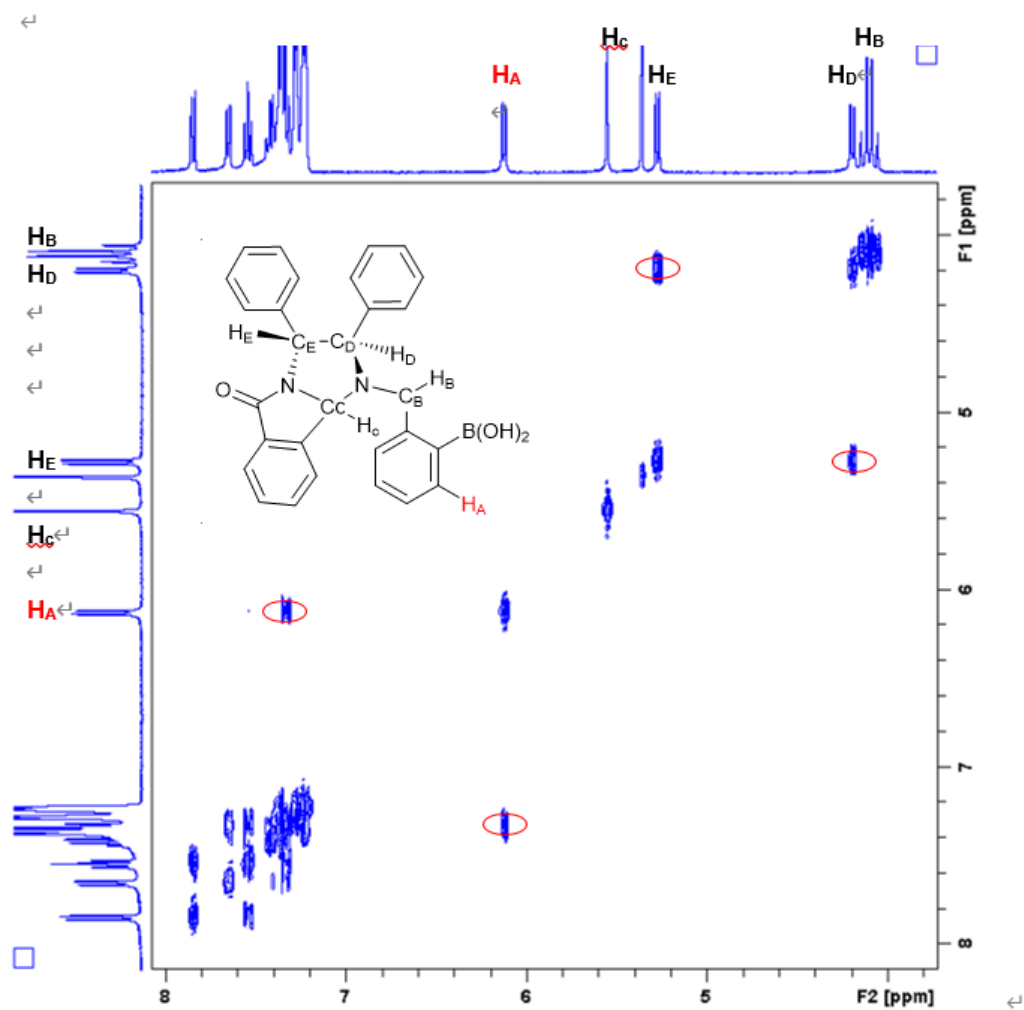



Figure S5. NMR data attesting for the absence of racemization in the derivatization process

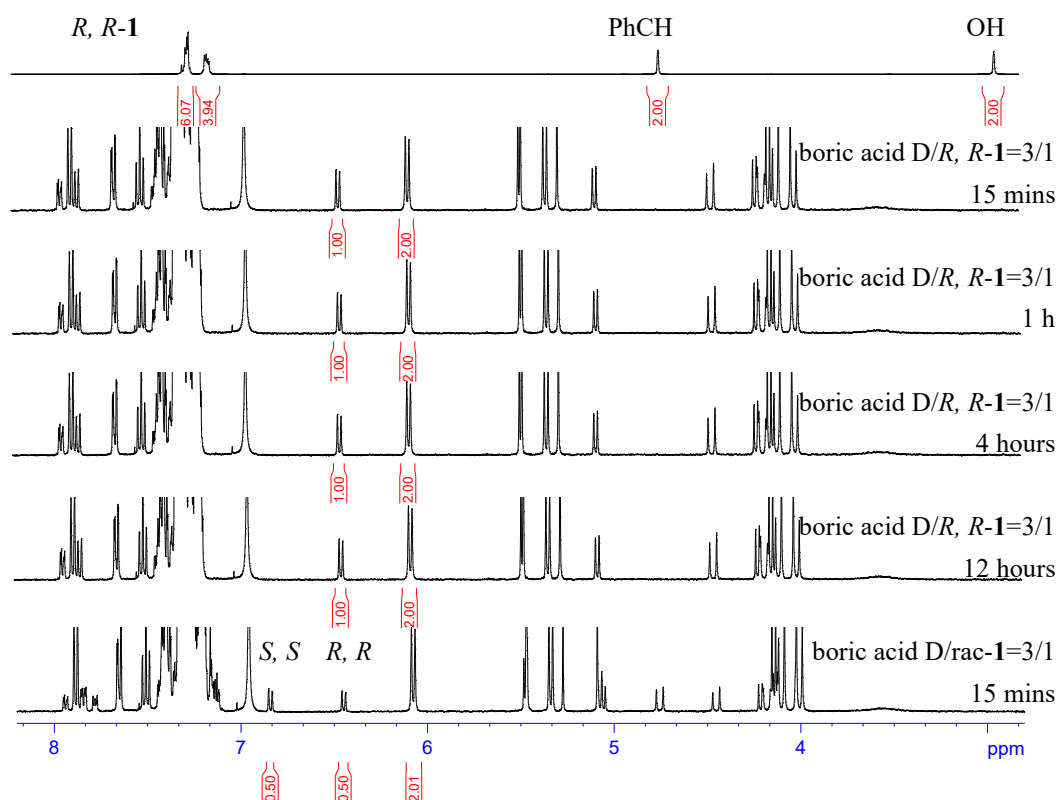

Figure S6. NMR data of optimization of derivatization reaction conditions

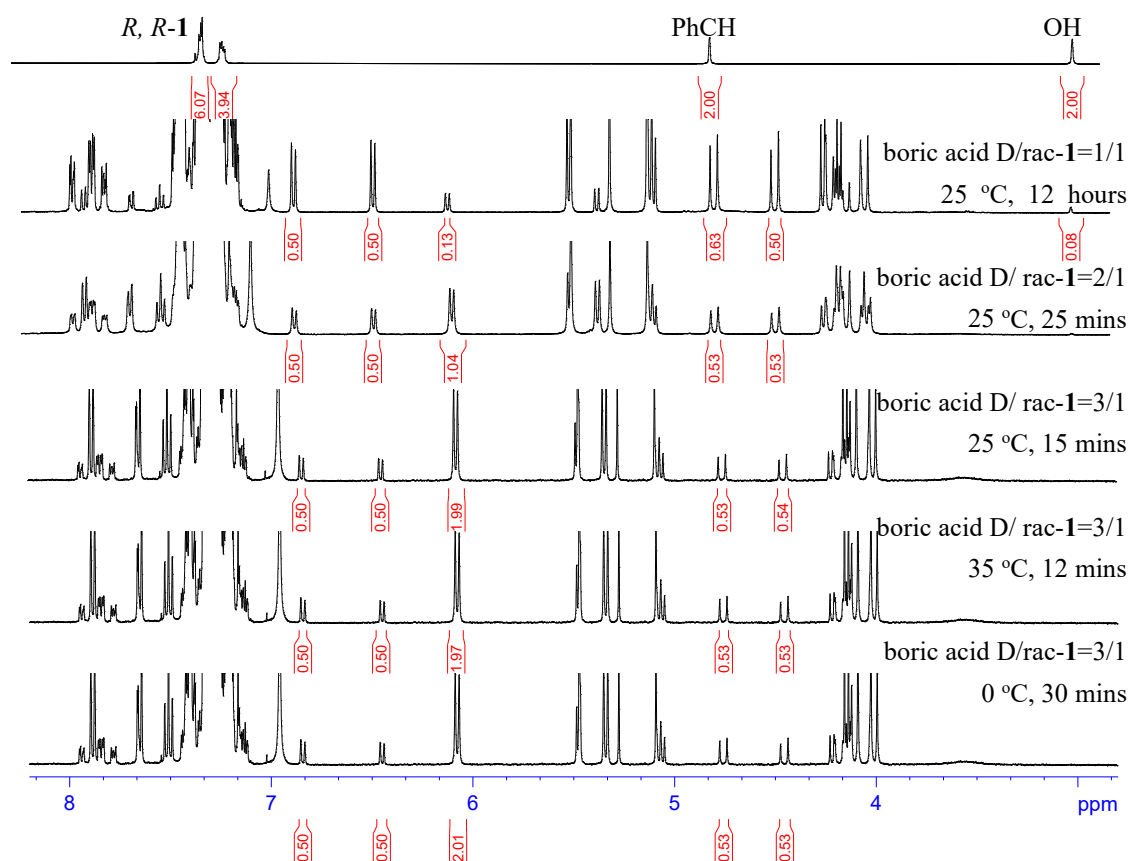

Figure S7. <sup>1</sup>H NMR of boric acid D and racemic 1

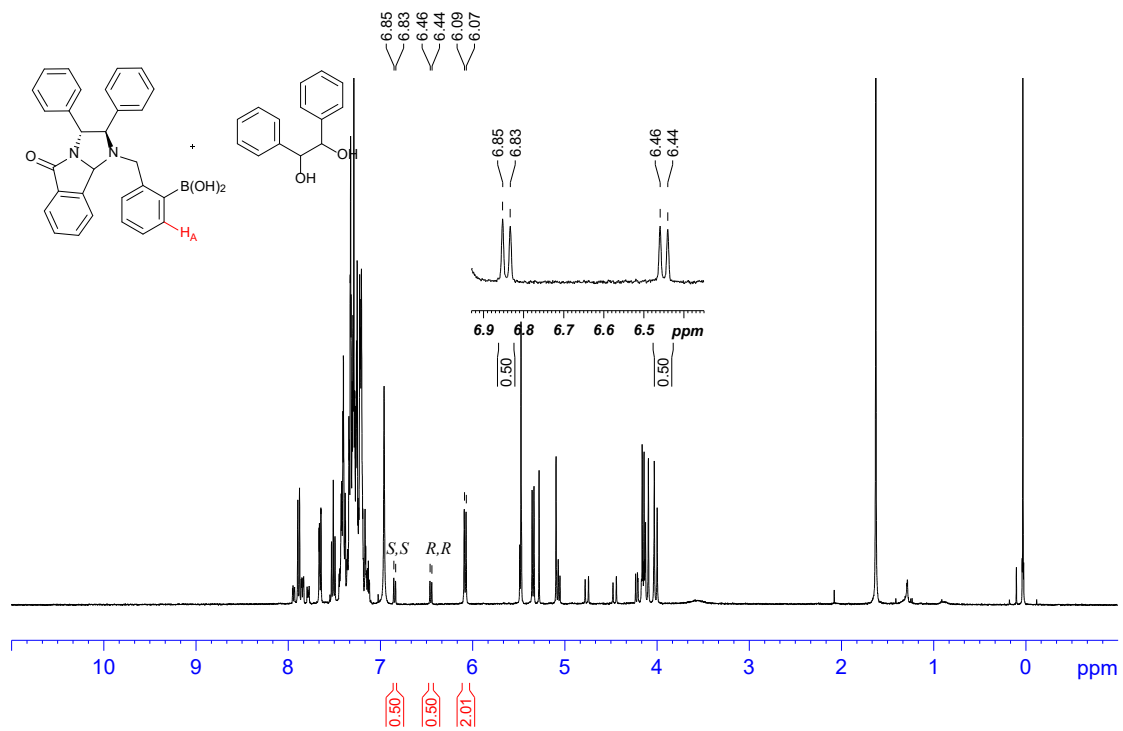

Figure S8. <sup>1</sup>H NMR of boric acid D and racemic 2

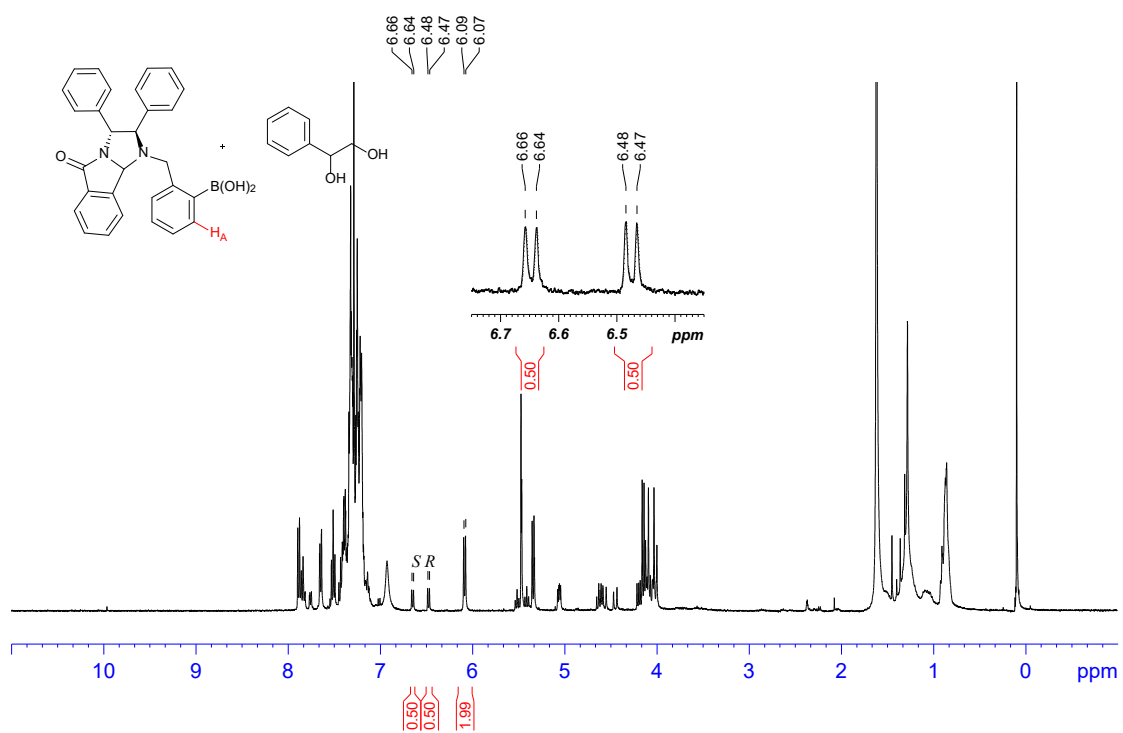

Figure S9. <sup>1</sup>H NMR of boric acid D and R-2

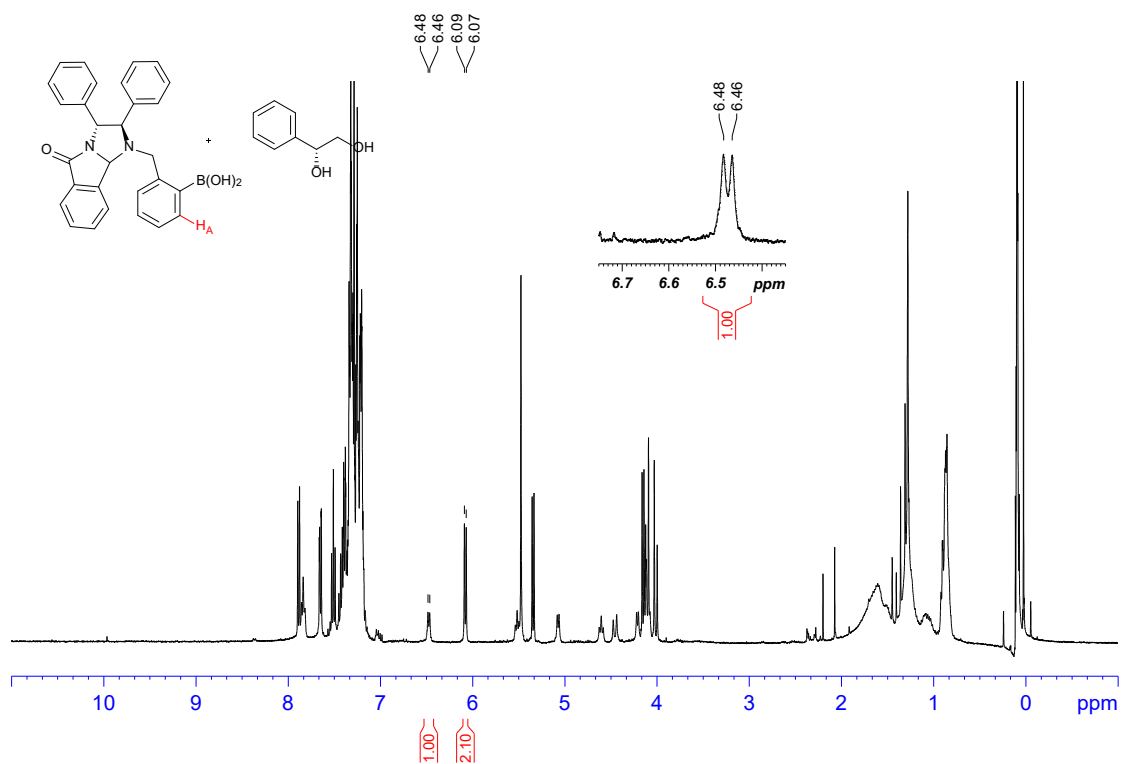

Figure S10. <sup>1</sup>H NMR of boric acid D and racemic 3

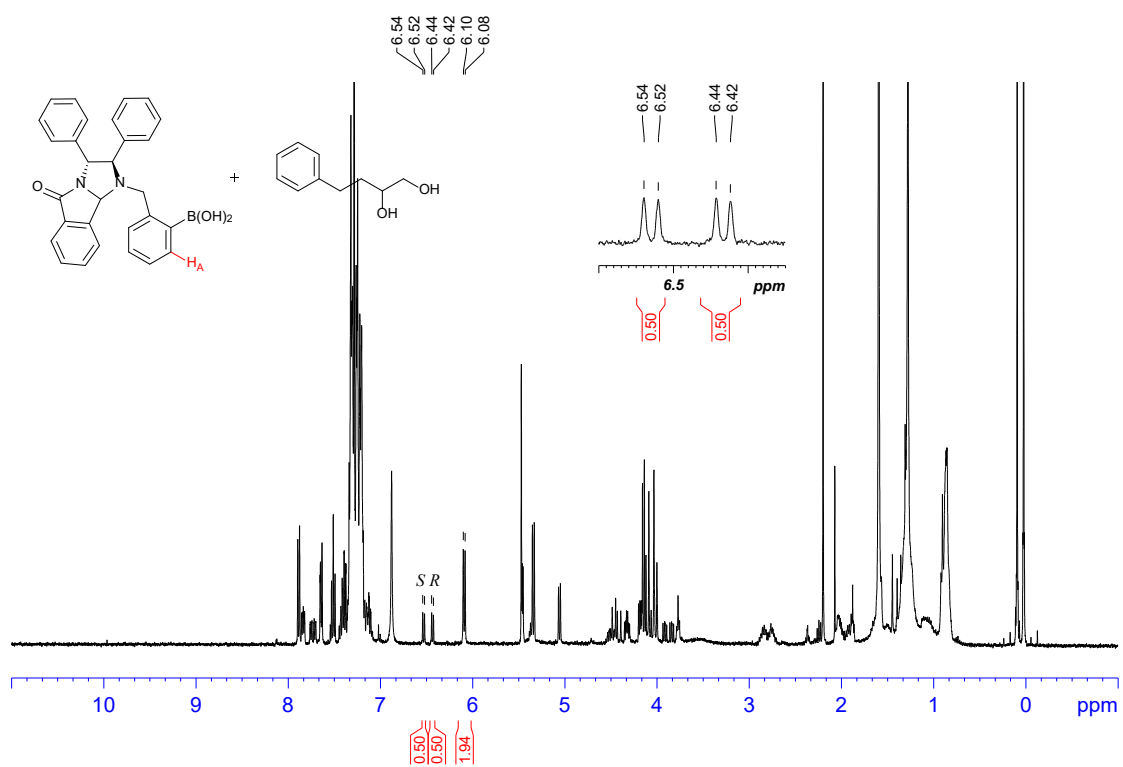



Figure S11.  $^1\text{H}$  NMR of boric acid D and *R*-3

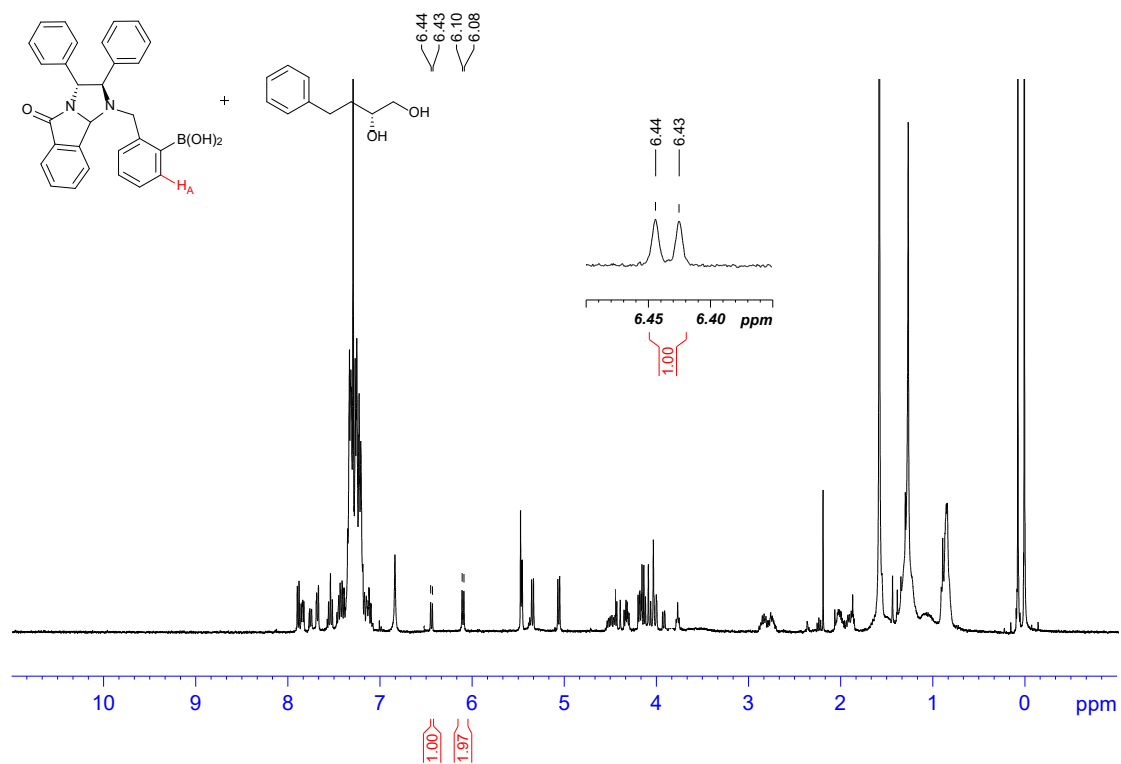

Figure S12.  $^1\text{H}$  NMR of boric acid D and racemic 4

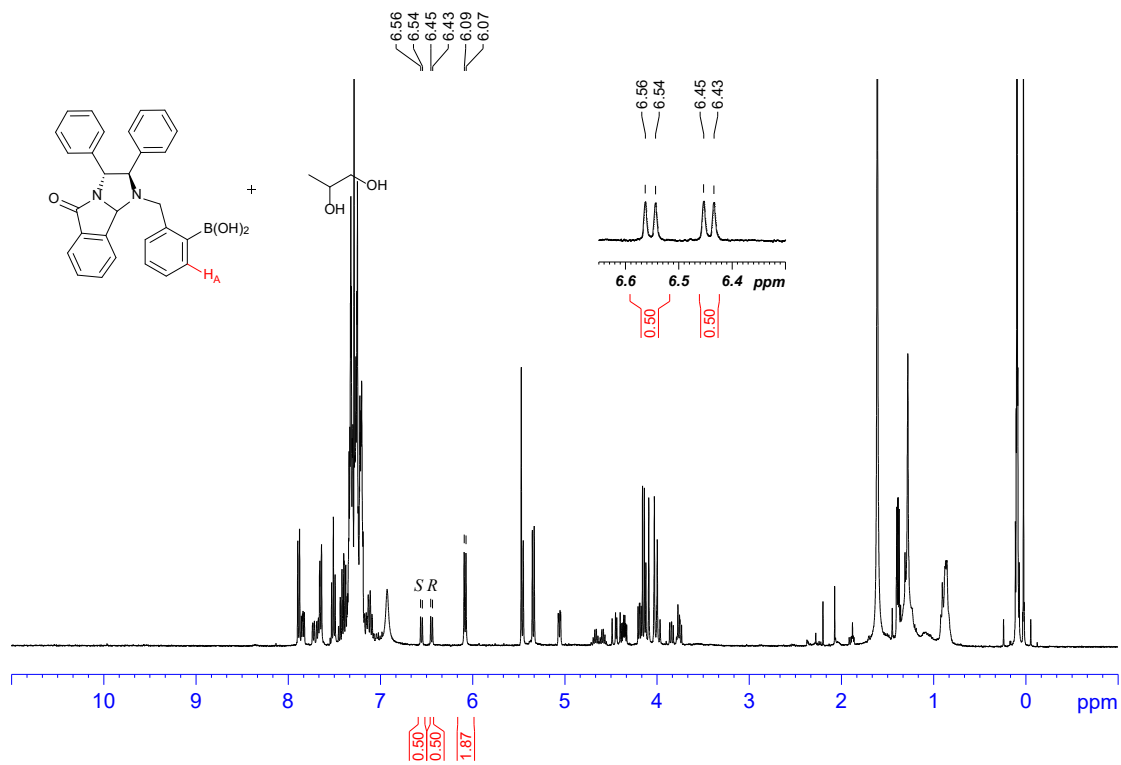

Figure S13. <sup>1</sup>H NMR of boric acid D and S-4

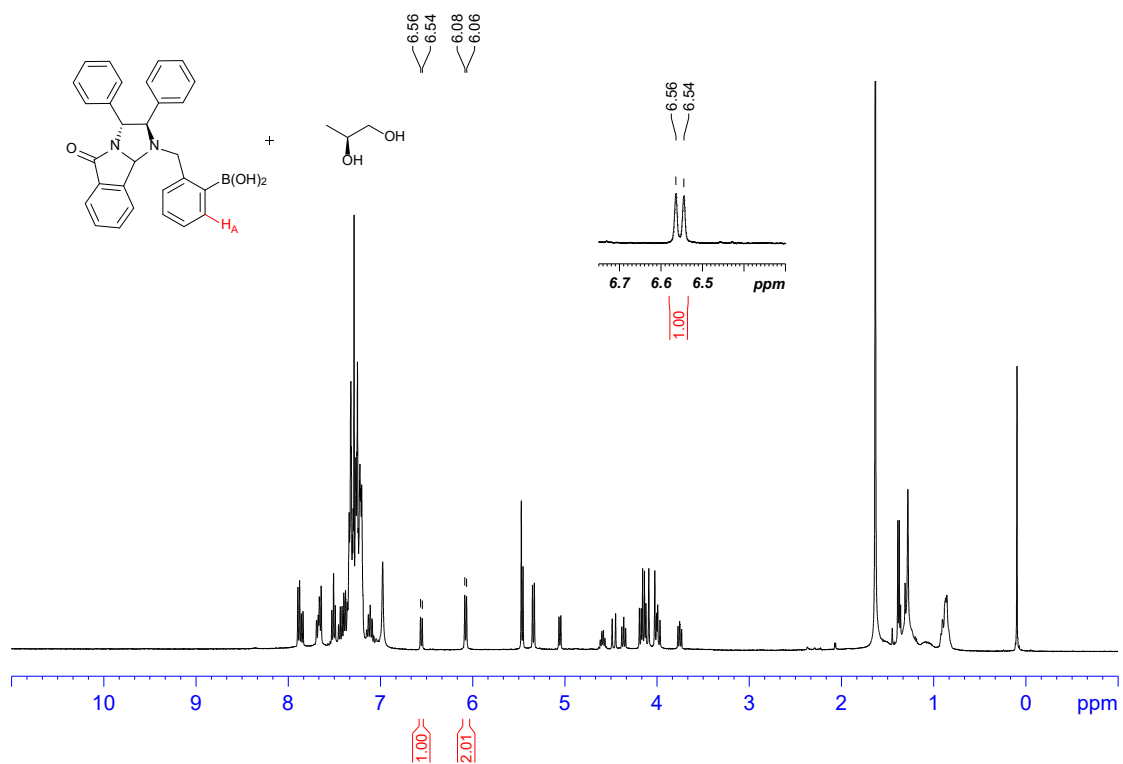

Figure S14. <sup>1</sup>H NMR of boric acid D and racemic 5

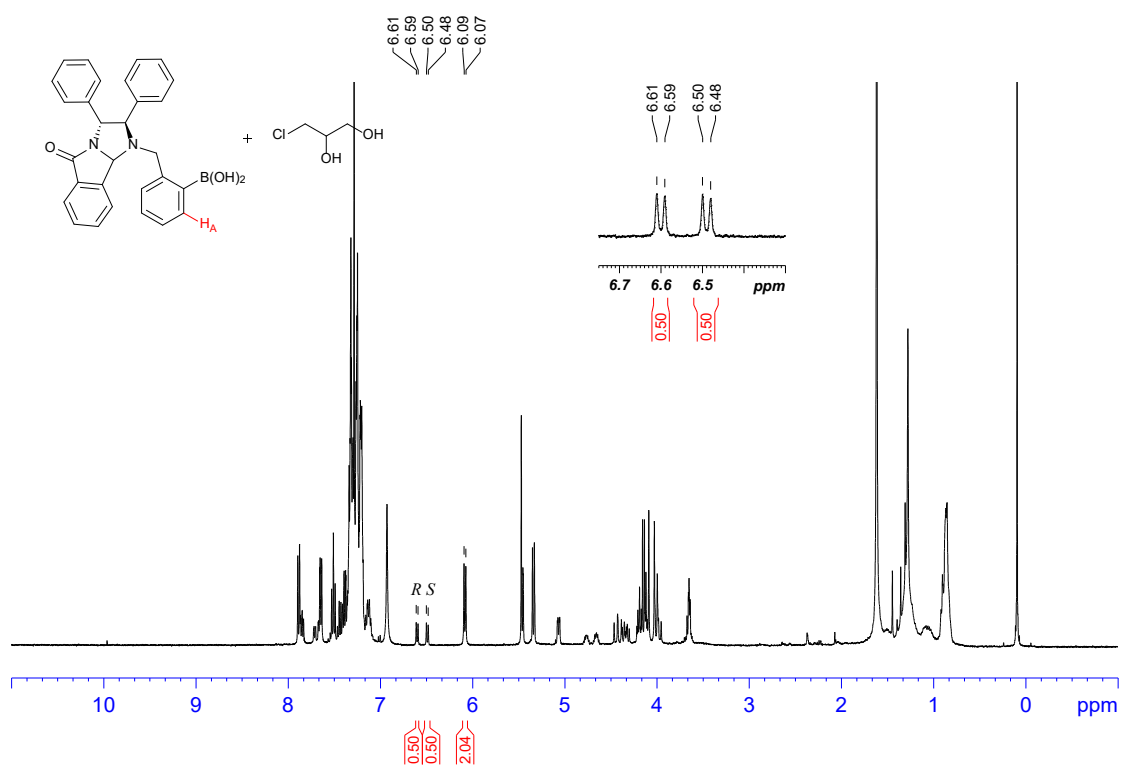

Figure S15. <sup>1</sup>H NMR of boric acid D and S-5

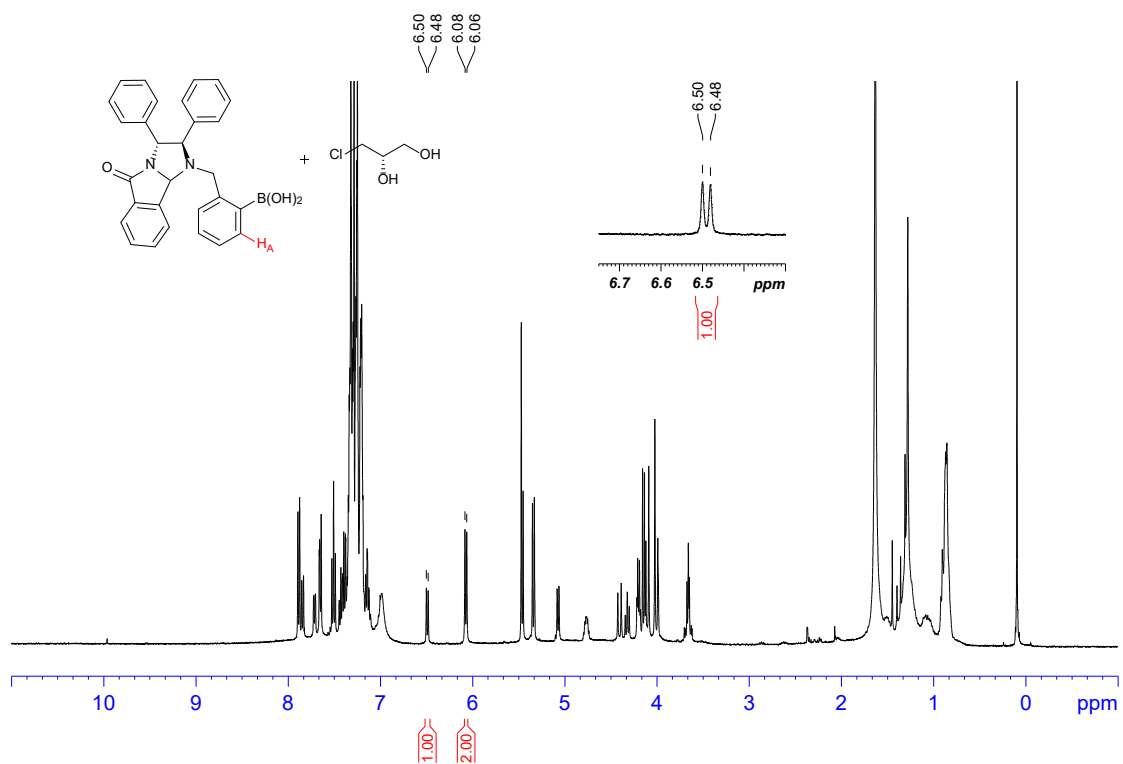

Figure S16. <sup>1</sup>H NMR of boric acid D and racemic 6

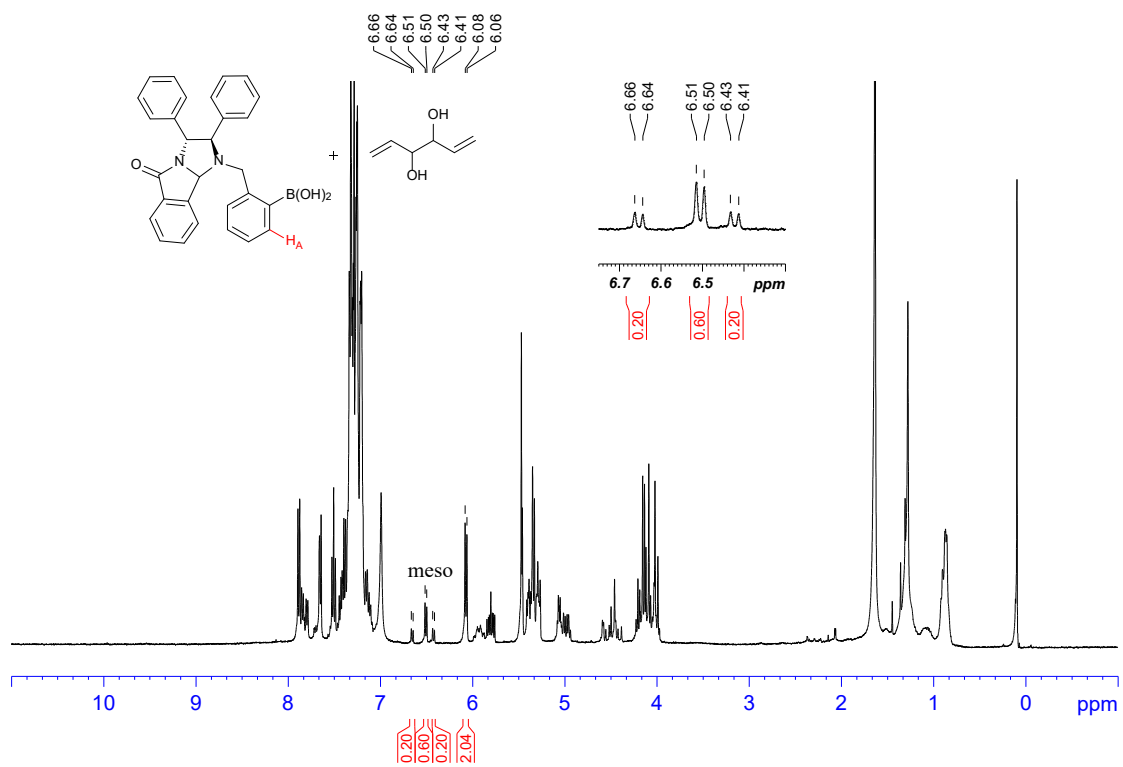

Figure S17. <sup>1</sup>H NMR of boric acid D and racemic 7

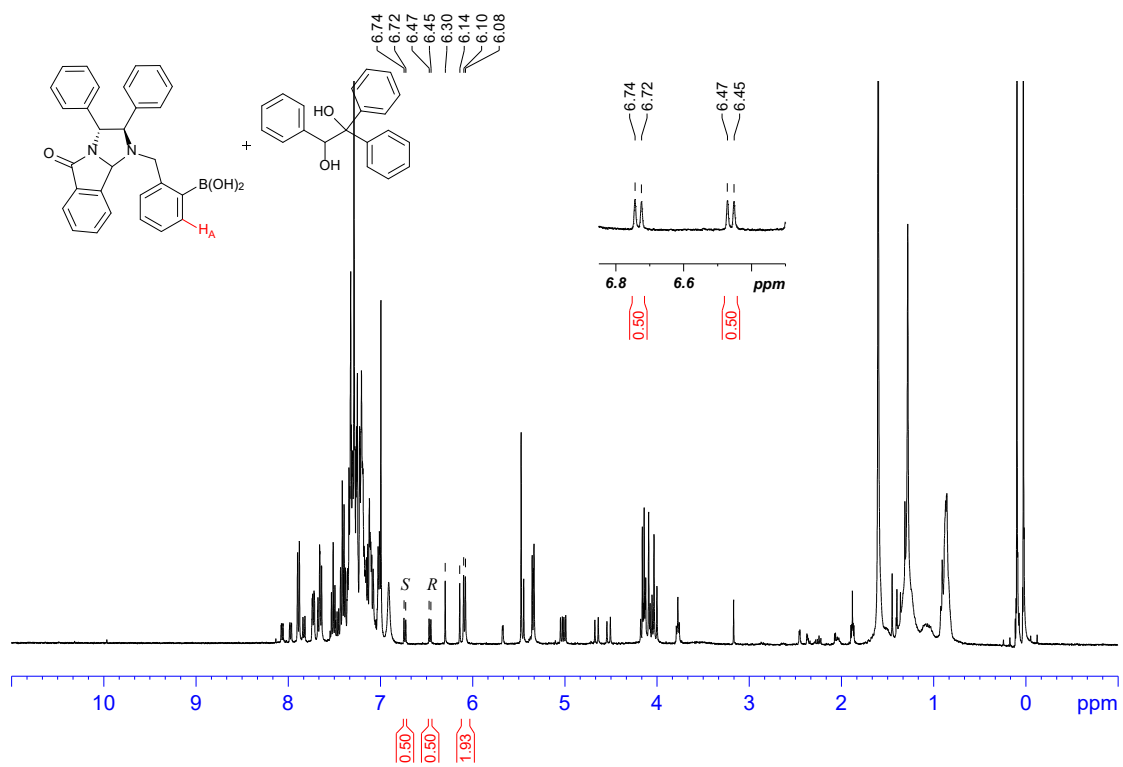

Figure S18. <sup>1</sup>H NMR of boric acid D and R-7

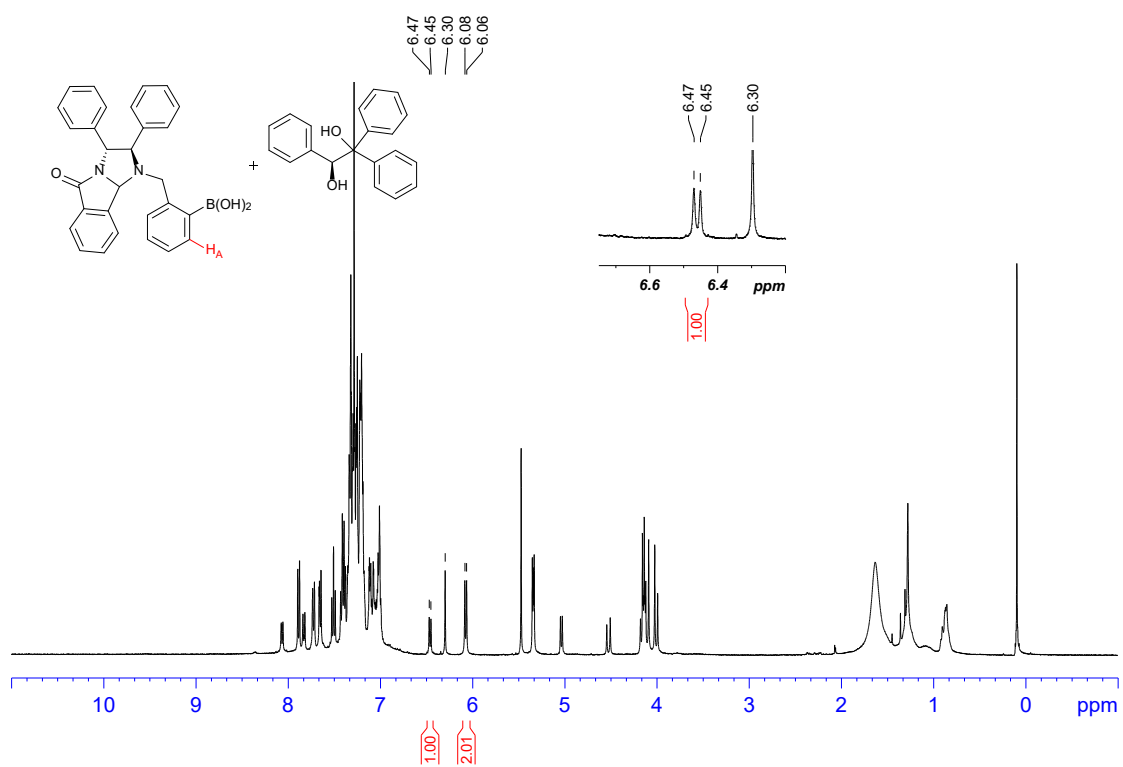

Figure S19.  $^1\text{H}$  NMR of boric acid D and racemic **8**

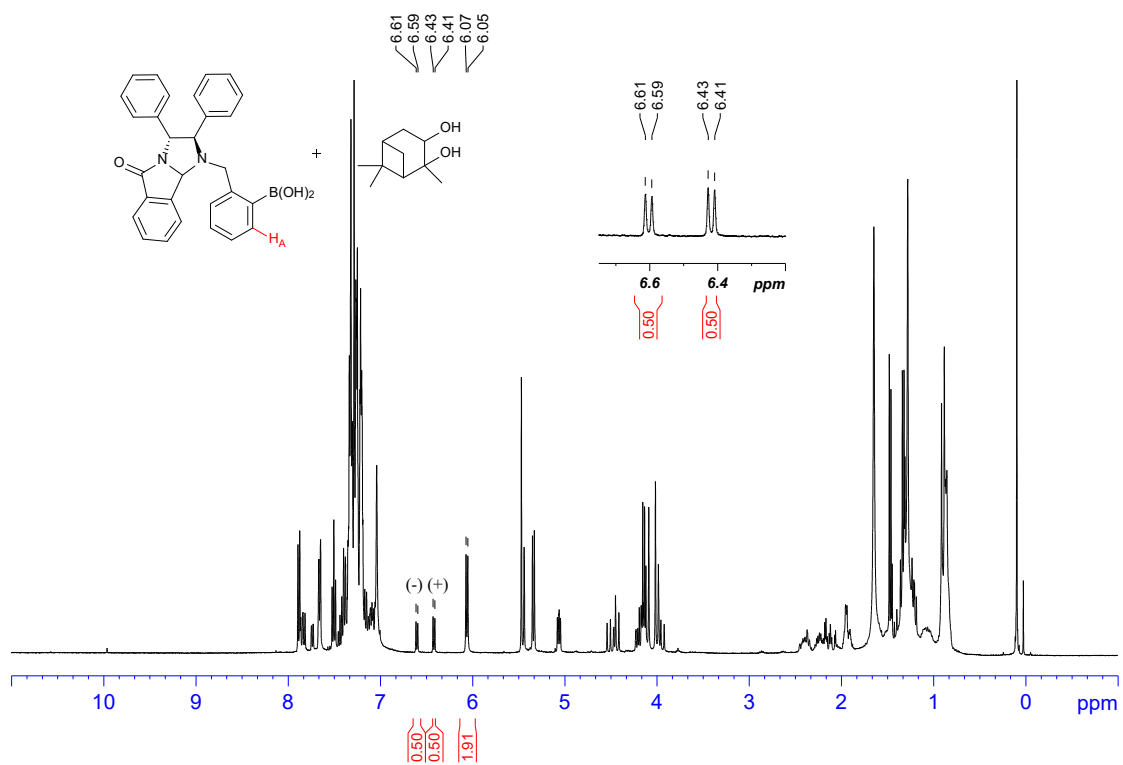

Figure S20.  $^1\text{H}$  NMR of boric acid D and (*1R,2R,3S,5R*)-(-)-**8**

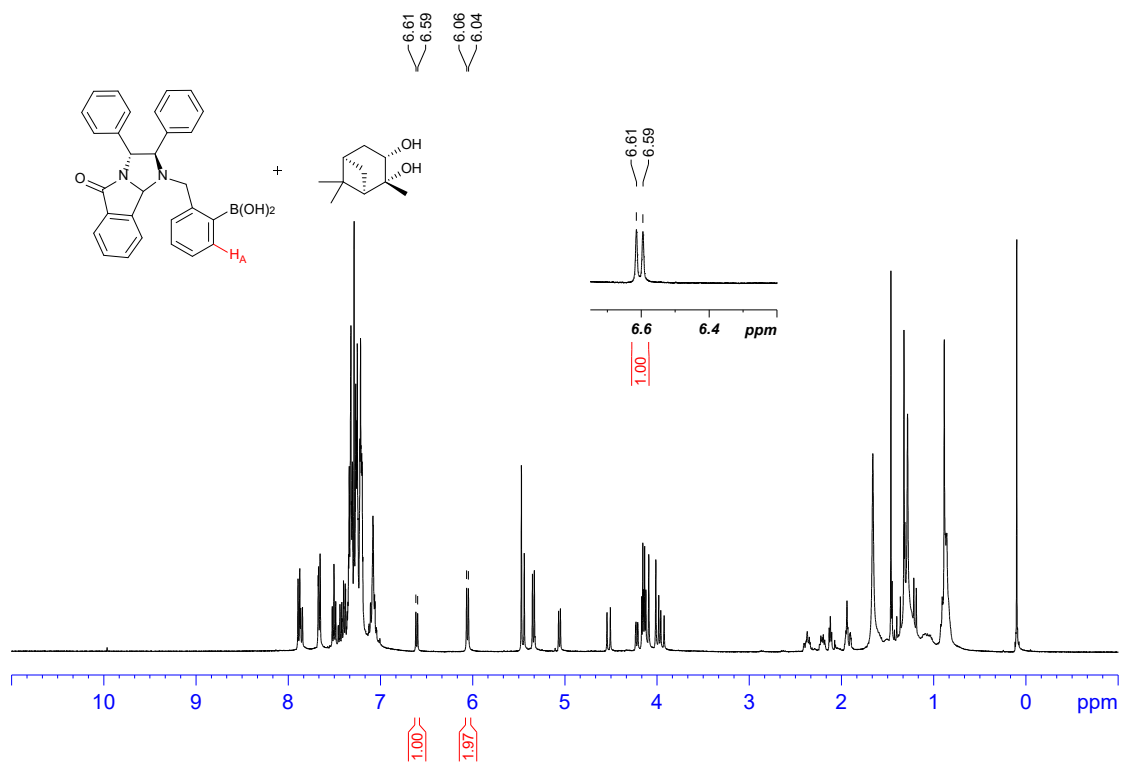

Figure S21. <sup>1</sup>H NMR of boric acid D and racemic **9**

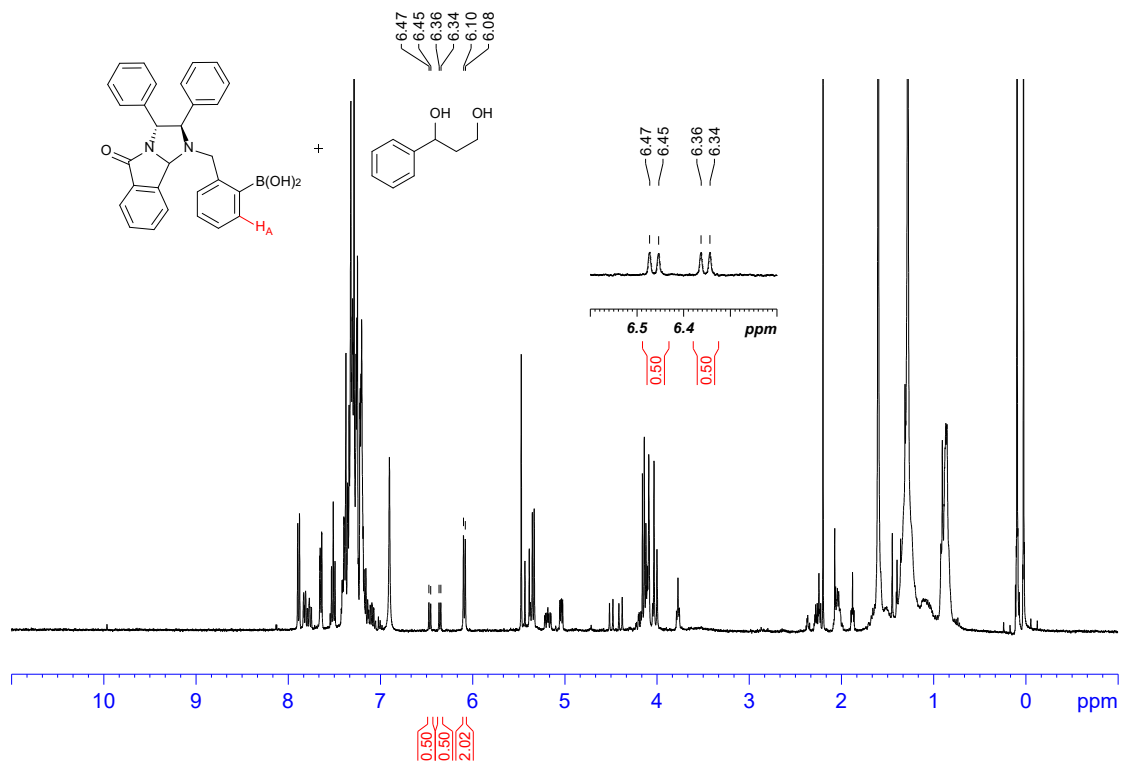

Figure S22. <sup>1</sup>H NMR of boric acid D and racemic **10**

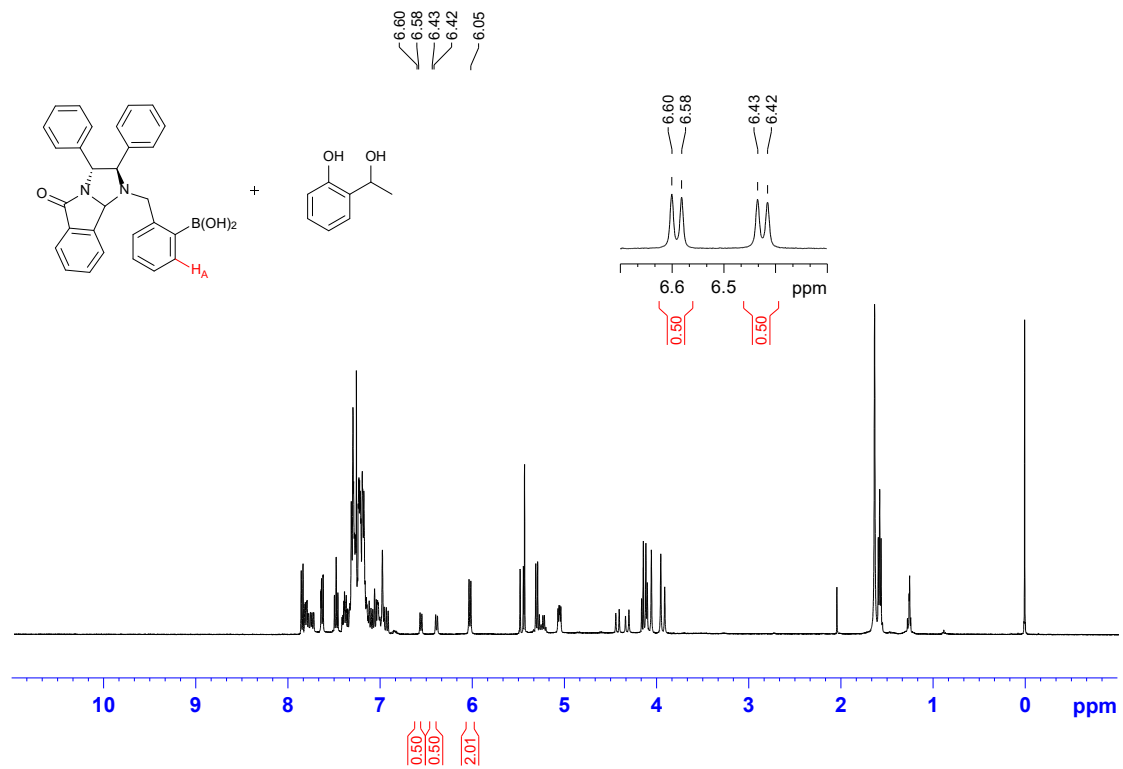

Figure S23.  $^1\text{H}$  NMR of boric acid D and racemic **11**

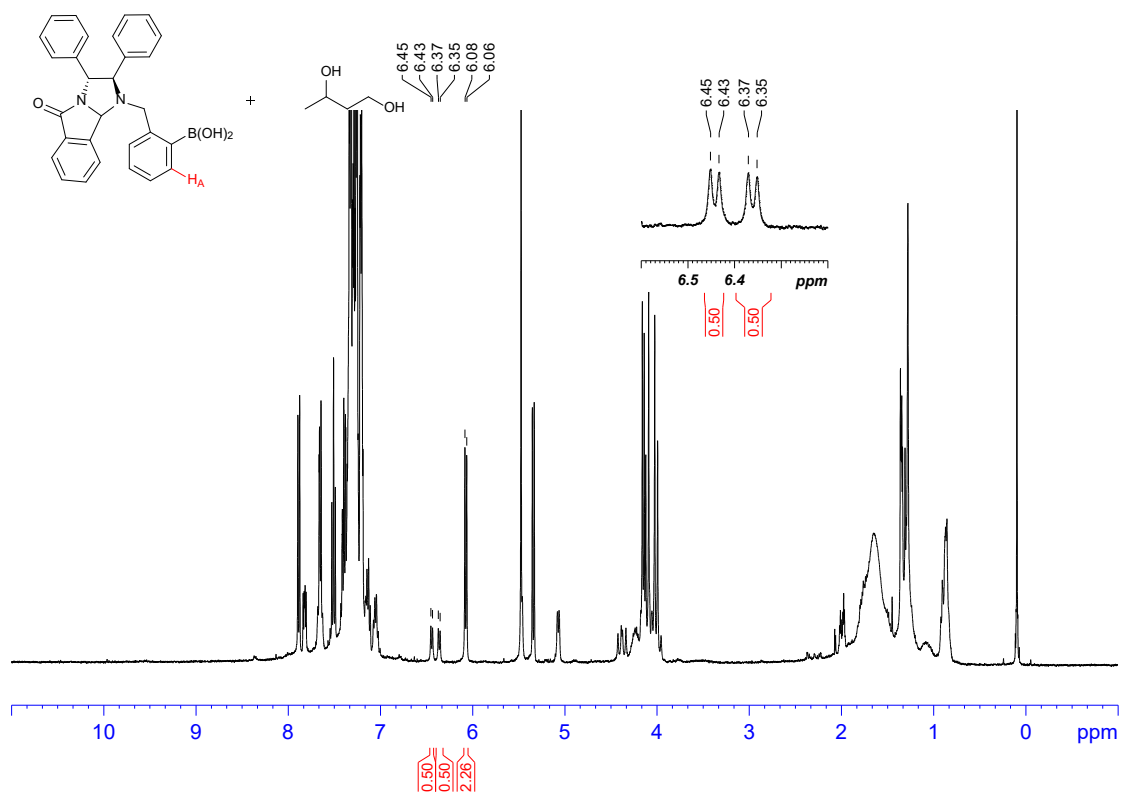

Figure S24.  $^1\text{H}$  NMR of boric acid D and racemic **12**

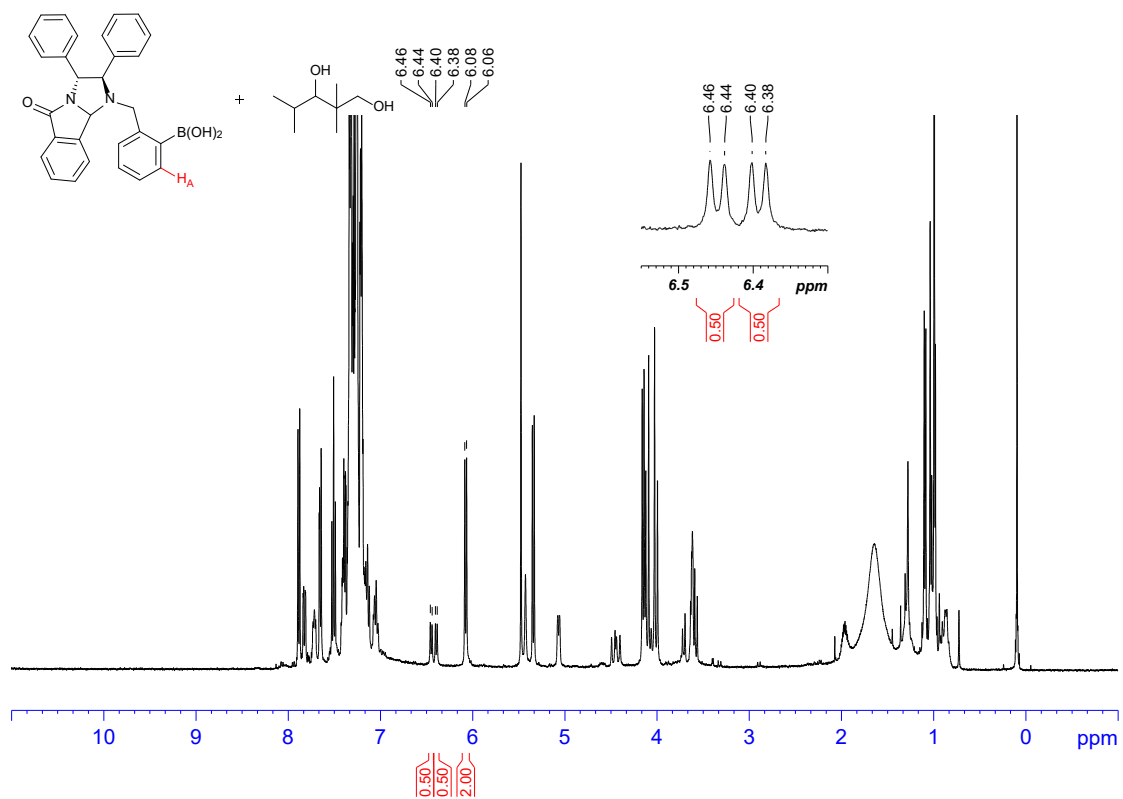

Figure S25. Ee values of nonracemic **1** determined by gravimetry and  $^1\text{H}$  NMR spectra with boric acid D.

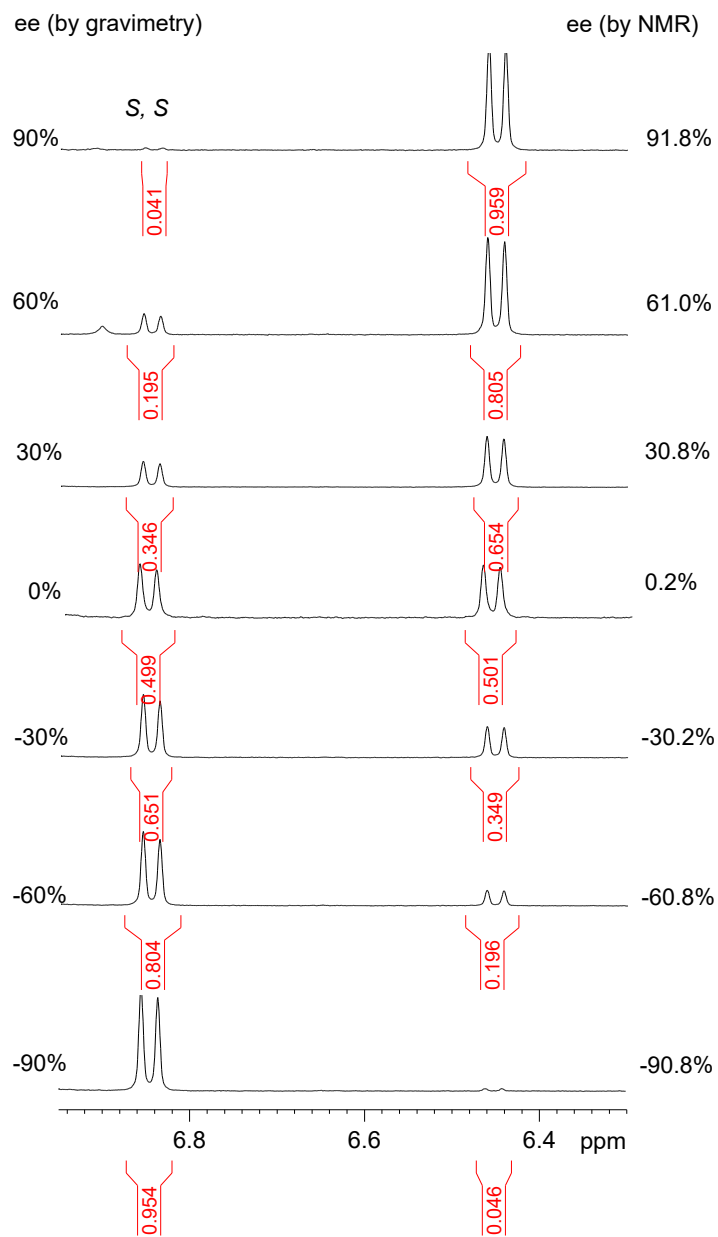

Ee values were defined in terms of (*R,R*)-**1**.
